# Supplementary material for: The Genomic Landscape of a Restricted ALL Cohort from Patients Residing on the U.S./Mexico Border
Source: MDPI journal article supplement (doi:10.3390/ijerph18147345), 2021-07-09
Supplement: s1 [file s1]

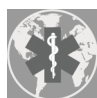

## Supplementary Material

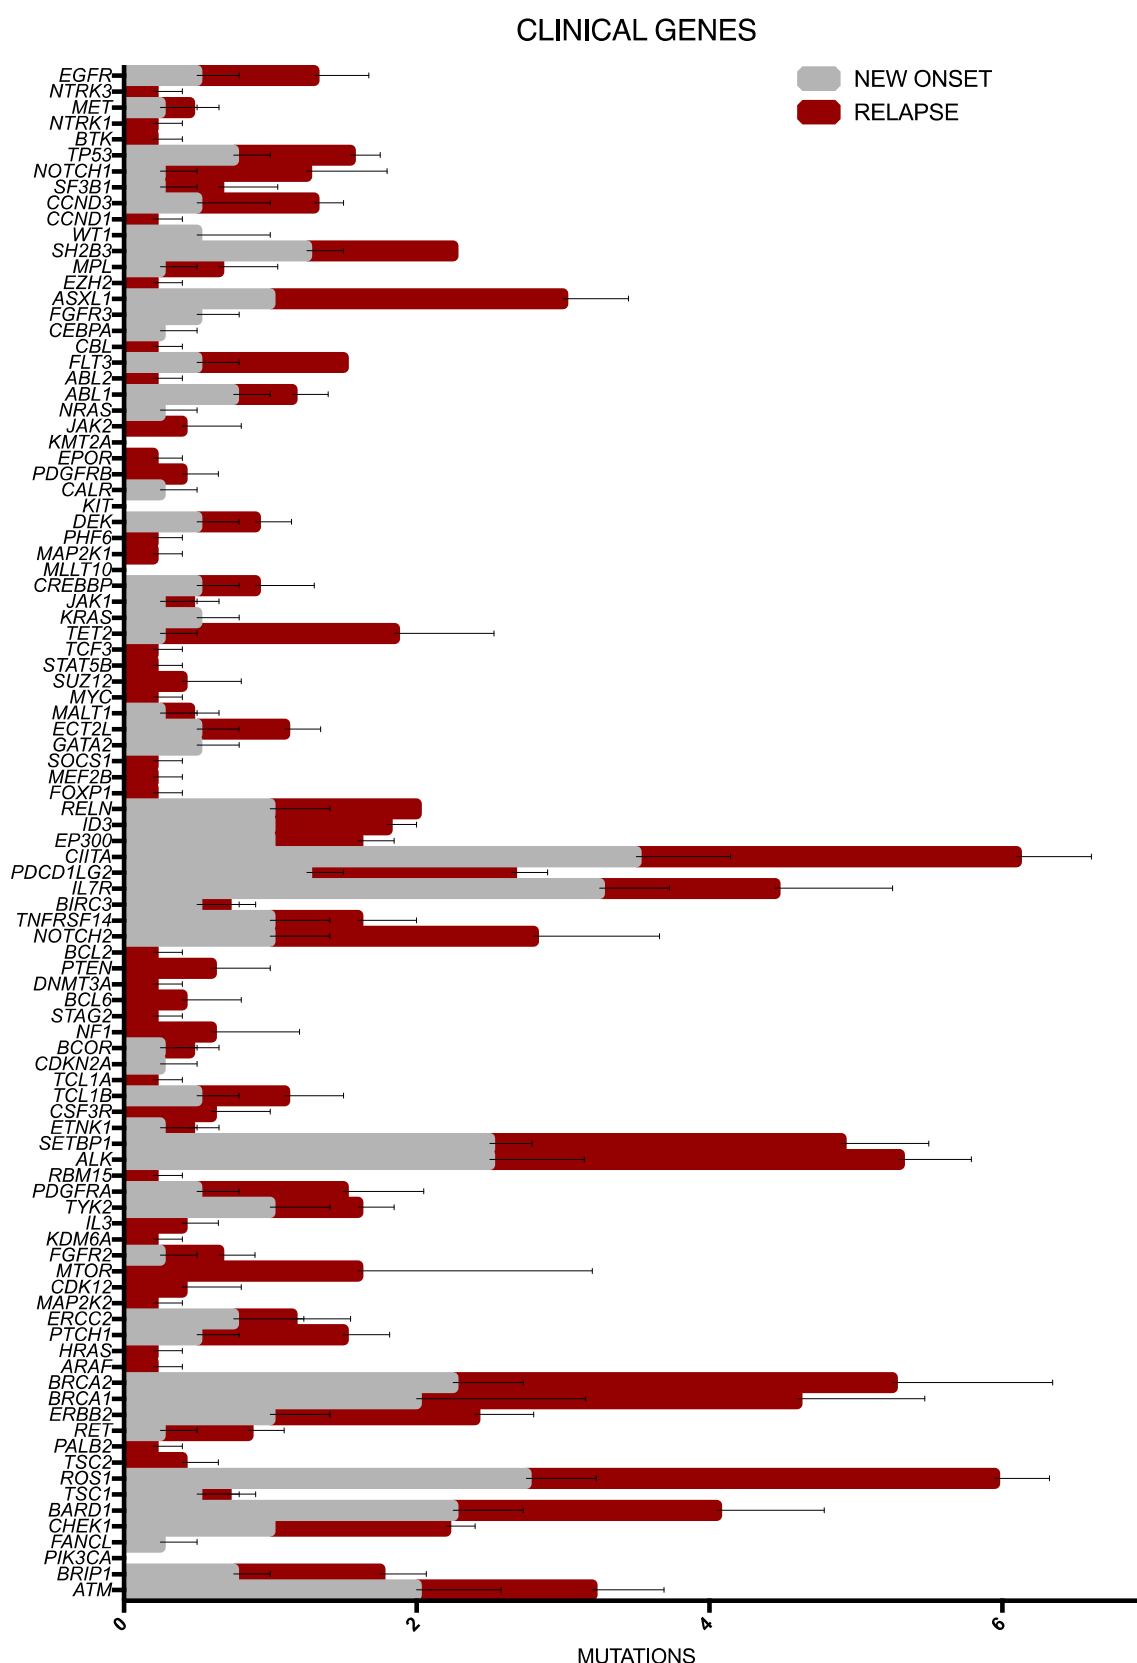

**Figure S1.** Clinically relevant genes. ALL mutations found in New onset (grey) and Relapse cases (maroon) are shown (Mean; SEM) in clinically relevant genes.
